# Supplementary material
Source: ML conference proceedings conference paper supplement (https://openaccess.thecvf.com/content/WACV2025/html/Biswas_Optimizing_Neural_Network_WACV_2025_paper.html)
Supplement: Supplementary file 1 [file Biswas_Optimizing_Neural_Network_WACV_2025_supplemental.pdf]

# Optimizing Neural Network Effectiveness via Non-monotonicity Refinement

Koushik Biswas<sup>1</sup>, Amit Reza<sup>2\*</sup>, Meghana Karri<sup>1\*</sup>, Debesh Jha<sup>1</sup>, Hongyi Pan<sup>1</sup>,  
Nikhil Tomar<sup>1</sup>, Aliza Subedi<sup>1</sup>, Smriti Regmi<sup>1</sup>, Ulas Bagci<sup>1</sup>

<sup>1</sup>Machine and Hybrid Intelligence Lab, Northwestern University, Chicago, IL, USA.

<sup>2</sup>Space Research Institute, Austrian Academy of Science, Graz, Austria

koushik.biswas@northwestern.edu

## Supplementary Material

**Proposition:** The following two equations (1 & 2) are equivalent.

$$\max(x_1, x_2) = \begin{cases} x_1 & \text{if } x_1 \geq x_2 \\ x_2 & \text{otherwise} \end{cases} \quad (1)$$

We can rewrite the equation (1) as follows:

$$\max(x_1, x_2) = x_1 + \max(0, x_2 - x_1) \quad (2)$$

### Proof:

Case-1:  $x_1 = x_2$ , then,

$$\max(x_1, x_2) = x_1 = x_2$$

Case-2:  $x_1 > x_2$ , then,  $x_2 - x_1 < 0$  and  $\max(0, x_2 - x_1) = 0$  so,

$$\max(x_1, x_2) = x_1$$

Case-3:  $x_1 < x_2$ , then,  $x_2 - x_1 > 0$  and  $\max(0, x_2 - x_1) = x_2 - x_1$ , so,

$$\max(x_1, x_2) = x_2$$

The SoftSign activation is defined as follows:

$$f(x) = \frac{x}{1 + |x|} \quad (3)$$

The SoftSign is not a differentiable function in the real line due to the  $|x|$  function.  $|x|$  can be approximated by  $x\text{erf}(\alpha x)$ ,  $x\tanh(\alpha x)$ ,  $\sqrt{x^2 + \alpha^2}$ . These three functions are infinite time differentiable, where  $\alpha$  is a non-negative hyperparameter. Thus, replacing  $|x|$  with three functions, we have three approximations as follows:

$$g_1(x; \alpha) = \frac{x}{1 + x\text{erf}(\alpha x)} \quad (4)$$

\*Amit Reza and Meghana Karri contributed equally to this work.

$$g_2(x; \alpha) = \frac{x}{1 + x\tanh(\alpha x)} \quad (5)$$

$$g_3(x; \alpha) = \frac{x}{1 + \sqrt{(x^2 + \alpha^2)}} \quad (6)$$

These functions have a range in  $[-1, 1]$ . We need to transfer it to the whole real line, by using the transformation  $x \rightarrow e^x$ , we have replace  $x$  by  $e^x$  in equation (4), equation (5), and equation (6).

$$g_1(x; \alpha) = \frac{e^x}{1 + e^x\text{erf}(\alpha e^x)} = \frac{1}{e^{-x} + \text{erf}(\alpha e^x)} \quad (7)$$

$$g_2(x; \alpha) = \frac{e^x}{1 + e^x\tanh(\alpha e^x)} = \frac{1}{e^{-x} + \tanh(\alpha e^x)} \quad (8)$$

$$g_3(x; \alpha) = \frac{e^x}{1 + \sqrt{(e^{2x} + \alpha^2)}} = \frac{1}{e^{-x} + \sqrt{(1 + e^{-2x}\alpha^2)}} \quad (9)$$

Activation functions should be non-monotonic. So, to make these functions non-monotonic, multiply by  $x$ . Also, We add another parameter,  $\beta$ , to control the smoothness of these functions.

$$g_1(x; \alpha, \beta) = \frac{x}{e^{-\beta x} + \text{erf}(\alpha e^x)} \quad (10)$$

$$g_2(x; \alpha, \beta) = \frac{x}{e^{-\beta x} + \tanh(\alpha e^x)} \quad (11)$$

$$g_3(x; \alpha, \beta) = \frac{x}{e^{-\beta x} + \sqrt{(1 + \alpha^2 e^{-2x})}} \quad (12)$$

Now, if we consider  $\beta \rightarrow \infty$ , for large positive  $x$ ,  $g_i(x; \alpha, \beta)$ ,  $i = 1, 2, 3$ , will converge to  $x$ . Also, note that, for  $\beta \rightarrow \infty$ , and for large negative  $x$ ,  $g_i(x; \alpha, \beta)$ ,  $i = 1, 2, 3$ , will converge 0. So for large  $\beta$ ,  $g_i(x; \alpha, \beta)$ ,  $i = 1, 2, 3$  converges to ReLU activation function.

# 1. Image Classification

## 1.1. MNIST, Fashion MNIST, and SVHN

We report more experiments on MNIST, Fashion MNIST, and SVHN datasets with LeNet [10] and AlexNet [9] architectures in Table 1 and Table 2 respectively. The experimental setup is the same as reported in the main document.

Table 1. Comparison between AMSU-1, AMSU-2, & AMSU-3 activations and other baseline activations on MNIST, Fashion MNIST, and SVHN datasets for image classification problem on LeNet architecture. We report Top-1 test accuracy (in %) for the mean of 15 different runs. mean±std is reported in the table.

| Activation Function | MNIST               | Fashion MNIST       | SVHN                |
|---------------------|---------------------|---------------------|---------------------|
| ReLU                | 99.15 ± 0.11        | 91.34 ± 0.19        | 92.01 ± 0.19        |
| Leaky ReLU          | 99.09 ± 0.11        | 91.32 ± 0.21        | 92.20 ± 0.21        |
| ReLU6               | 99.24 ± 0.12        | 91.40 ± 0.21        | 92.32 ± 0.17        |
| PReLU               | 99.20 ± 0.11        | 91.43 ± 0.21        | 92.12 ± 0.21        |
| ELU                 | 99.26 ± 0.10        | 91.32 ± 0.22        | 92.20 ± 0.19        |
| Softplus            | 99.00 ± 0.21        | 91.03 ± 0.24        | 91.86 ± 0.25        |
| GELU                | 99.30 ± 0.07        | 91.66 ± 0.15        | 92.50 ± 0.14        |
| Swish               | 99.25 ± 0.10        | 91.75 ± 0.14        | 92.32 ± 0.16        |
| PAU                 | 99.36 ± 0.11        | 91.72 ± 0.13        | 92.32 ± 0.17        |
| Mish                | 99.34 ± 0.06        | <b>91.72</b> ± 0.13 | 92.36 ± 0.16        |
| AMSU-1              | <b>99.50</b> ± 0.04 | 91.61 ± 0.14        | <b>92.70</b> ± 0.16 |
| AMSU-2              | <b>99.45</b> ± 0.06 | 91.55 ± 0.14        | <b>92.77</b> ± 0.14 |
| AMSU-3              | <b>99.40</b> ± 0.07 | 91.54 ± 0.15        | <b>92.60</b> ± 0.14 |

Table 2. Comparison between AMSU-1, AMSU-2, & AMSU-3 activations and other baseline activations on MNIST, Fashion MNIST, and SVHN datasets for image classification problem on AlexNet architecture. We report Top-1 test accuracy (in %) for the mean of 15 different runs. mean±std is reported in the table.

| Activation Function | MNIST               | Fashion MNIST       | SVHN                |
|---------------------|---------------------|---------------------|---------------------|
| ReLU                | 99.45 ± 0.08        | 92.77 ± 0.21        | 95.12 ± 0.17        |
| Leaky ReLU          | 99.55 ± 0.08        | 92.80 ± 0.16        | 95.17 ± 0.15        |
| ReLU6               | 99.50 ± 0.04        | 92.88 ± 0.13        | 95.13 ± 0.12        |
| PReLU               | 99.40 ± 0.08        | 92.70 ± 0.18        | 95.18 ± 0.14        |
| ELU                 | 99.50 ± 0.06        | 92.91 ± 0.14        | 95.10 ± 0.14        |
| Softplus            | 99.20 ± 0.10        | 92.36 ± 0.26        | 94.57 ± 0.21        |
| GELU                | 99.50 ± 0.06        | 93.17 ± 0.11        | 95.24 ± 0.12        |
| Swish               | 99.55 ± 0.06        | 92.95 ± 0.15        | 95.34 ± 0.17        |
| PAU                 | 99.54 ± 0.11        | 93.04 ± 0.15        | 95.37 ± 0.13        |
| Mish                | 99.60 ± 0.06        | 93.19 ± 0.16        | 95.38 ± 0.14        |
| AMSU-1              | <b>99.70</b> ± 0.04 | <b>93.38</b> ± 0.10 | <b>95.63</b> ± 0.14 |
| AMSU-2              | <b>99.72</b> ± 0.05 | <b>93.34</b> ± 0.10 | <b>95.68</b> ± 0.11 |
| AMSU-3              | <b>99.63</b> ± 0.06 | <b>93.26</b> ± 0.12 | <b>95.52</b> ± 0.12 |

## 1.2. CIFAR

We report more experiments on the CIFAR100 and CIFAR10 datasets with AlexNet, Inception V3, DenseNet-121, WideResNet 28-10, ShuffleNet V1, Googl-eNet, SqueezeNet, VGG 16, and LeNet architectures in Table 5 and Table 9 respectively. An extension to the Table 2 (from main paper) on CIFAR100 dataset with baseline activations are reported in Table 6 & Table 7 and an extension to the Table 3 (from main paper) on CIFAR10 dataset with baseline activations are reported in Table 8 & Table 10.

## 1.3. Semantic Segmentation

We report more experiments on semantic segmentation with the CityScapes [4] dataset with the UNet model and

the Pascal Voc dataset with PspNet [19]. We consider the same experimental setup as mentioned in the main document. The results are reported in Table 3 and Table 4.

Table 3. Comparison between baseline activations and AMSU-1, AMSU-2, & AMSU-3 on the CityScapes dataset for semantic segmentation problem on UNet. We report mIOU for the mean of 10 different runs. mean±std is reported in the table.

| Activation Function | mIOU               |
|---------------------|--------------------|
| ReLU                | 69.5 ± 0.07        |
| Leaky ReLU          | 69.7 ± 0.07        |
| PReLU               | 69.7 ± 0.08        |
| ReLU6               | 69.6 ± 0.10        |
| ELU                 | 69.5 ± 0.06        |
| SoftPlus            | 69.2 ± 0.10        |
| Swish               | 70.0 ± 0.08        |
| Mish                | 70.1 ± 0.09        |
| GELU                | 69.9 ± 0.10        |
| PAU                 | 70.1 ± 0.06        |
| AMSU-1              | <b>70.5</b> ± 0.09 |
| AMSU-2              | <b>70.7</b> ± 0.09 |
| AMSU-3              | <b>70.3</b> ± 0.10 |

Table 4. Comparison between baseline activations and AMSU-1, AMSU-2, & AMSU-3 on the Pascal VOC dataset for semantic segmentation problem on PSPNet. We report mIOU for the mean of 10 different runs. mean±std is reported in the table.

| Activation Function | mIOU               |
|---------------------|--------------------|
| ReLU                | 78.9 ± 0.07        |
| Leaky ReLU          | 79.0 ± 0.06        |
| PReLU               | 79.1 ± 0.04        |
| ReLU6               | 79.1 ± 0.04        |
| ELU                 | 79.2 ± 0.05        |
| SoftPlus            | 78.4 ± 0.10        |
| Swish               | 79.6 ± 0.04        |
| Mish                | 79.5 ± 0.06        |
| GELU                | 79.4 ± 0.04        |
| PAU                 | 79.4 ± 0.04        |
| AMSU-1              | <b>79.9</b> ± 0.04 |
| AMSU-2              | <b>80.0</b> ± 0.04 |
| AMSU-3              | <b>79.5</b> ± 0.06 |

# 2. Machine Translation

This section presents a detailed experimental evaluation of the proposed activation functions and baseline functions on the machine translation problem. This problem deals with translating text or speech data from one language to another without the help of any human being. The WMT 2014 English→German dataset is used for our experiment. The database contains a 4.5 million training dataset ( i.e., sentences). We use an attention-based [18] 8-head transformer network with Adam optimizer [8], 0.1 dropout rate [16], and trained up to  $10^5$  steps without changing the Other hyperparameters [18]. We evaluate the network performance on the newstest2014 dataset using the BLEU score metric. We report the mean of 10 different runs in Table 11 on the test dataset(newstest2014). It shows that the results are stable on different runs (mean±std), and we got 0.6%, 0.6%, 0.5% boost in BLEU score for the proposed AMSU-1, AMSU-2, & AMSU-3 activations respectively compared to ReLU.

Table 5. Comparison between AMSU-1, AMSU-2, & AMSU-3 activations and other baseline activations on CIFAR100 dataset for image classification problem. We report Top-1 test accuracy (in %) for the mean of 20 different runs. mean±std is reported in the table.

| Activation Function | Alex Net           | Shuffle Net V1     | Google Net         | Inception V3       | Dense Net 121      | WideRes Net 28-10  | Squeeze Net        | VGG 16             | LeNet              |
|---------------------|--------------------|--------------------|--------------------|--------------------|--------------------|--------------------|--------------------|--------------------|--------------------|
| ReLU                | 54.78 ±0.27        | 65.70 ±0.27        | 72.50 ±0.33        | 74.23 ±0.25        | 75.76 ±0.26        | 76.44 ±0.27        | 66.11 ±0.28        | 71.79 ±0.28        | 45.42 ±0.26        |
| Leaky ReLU          | 55.50 ±0.29        | 65.90 ±0.27        | 72.49 ±0.29        | 74.40 ±0.27        | 75.80 ±0.26        | 76.50 ±0.28        | 66.23 ±0.30        | 71.99 ±0.28        | 45.69 ±0.27        |
| ReLU6               | 55.77 ±0.25        | 66.23 ±0.27        | 72.57 ±0.25        | 74.53 ±0.25        | 75.89 ±0.27        | 76.63 ±0.26        | 66 ±0.26           | 71.55 ±0.25        | 45.80 ±0.27        |
| PReLU               | 55.50 ±0.26        | 65.82 ±0.31        | 72.51 ±0.26        | 74.22 ±0.27        | 76.22 ±0.26        | 76.67 ±0.26        | 66.30 ±0.26        | 71.86 ±0.29        | 45.50 ±0.30        |
| ELU                 | 55.88 ±0.27        | 65.79 ±0.26        | 72.81 ±0.26        | 74.55 ±0.26        | 75.77 ±0.22        | 76.17 ±0.27        | 66.30 ±0.27        | 71.70 ±0.31        | 46.15 ±0.27        |
| Softplus            | 54.90 ±0.37        | 65.01 ±0.35        | 71.68 ±0.37        | 74.11 ±0.35        | 75.33 ±0.34        | 75.52 ±0.36        | 65.60 ±0.34        | 70.90 ±0.30        | 44.01 ±0.37        |
| GELU                | 57.21 ±0.28        | 67.17 ±0.24        | 73.10 ±0.24        | 75.60 ±0.26        | 76.77 ±0.24        | 77.20 ±0.23        | 66.88 ±0.28        | 71.80 ±0.28        | 47.50 ±0.24        |
| Swish               | 57.47 ±0.29        | 67.14 ±0.28        | 73.39 ±0.28        | 75.59 ±0.26        | 76.63 ±0.30        | 77.47 ±0.26        | 66.48 ±0.25        | 71.82 ±0.27        | 47.42 ±0.25        |
| PAU                 | 57.20 ±0.28        | 67.39 ±0.27        | 73.59 ±0.26        | 75.77 ±0.28        | 76.81 ±0.28        | 77.17 ±0.24        | 66.70 ±0.22        | 71.68 ±0.24        | 47.42 ±0.30        |
| Mish                | 58.10 ±0.25        | 67.77 ±0.26        | 74.06 ±0.25        | 76.20 ±0.23        | 77.32 ±0.24        | 77.36 ±0.21        | 67.45 ±0.25        | 72.44 ±0.21        | <b>47.55</b> ±0.30 |
| AMSU-1              | <b>61.35</b> ±0.20 | <b>69.30</b> ±0.25 | <b>74.50</b> ±0.22 | <b>77.69</b> ±0.23 | <b>78.41</b> ±0.20 | <b>78.69</b> ±0.21 | <b>68.66</b> ±0.23 | <b>73.49</b> ±0.23 | 47.41 ±0.23        |
| AMSU-2              | <b>61.27</b> ±0.22 | <b>69.38</b> ±0.23 | <b>74.51</b> ±0.24 | <b>77.58</b> ±0.20 | <b>78.30</b> ±0.23 | <b>78.61</b> ±0.24 | <b>68.51</b> ±0.20 | <b>73.33</b> ±0.20 | 47.30 ±0.22        |
| AMSU-3              | <b>61.10</b> ±0.22 | <b>68.86</b> ±0.20 | <b>74.20</b> ±0.22 | <b>77.06</b> ±0.20 | <b>78.23</b> ±0.22 | <b>78.27</b> ±0.22 | <b>68.29</b> ±0.24 | 72.41 ±0.22        | 47.18 ±0.20        |

Table 6. This is an extension to Table 2. We report Top-1 test accuracy (in %) on the CIFAR100 dataset for baseline functions for the mean of 20 different runs. mean±std is reported in the table. SF V2 stands for ShuffleNet v2.

| Activation Function | SF V2 0.5x  | SF V2 1.0x  | SF V2 1.5x  | SF V2 2.0x  | SeNet 18    | SeNet 34    | SeNet 50    | Res-Next    | Xception    | EfficientNet B0 |
|---------------------|-------------|-------------|-------------|-------------|-------------|-------------|-------------|-------------|-------------|-----------------|
| Leaky ReLU          | 62.18 ±0.30 | 65.28 ±0.32 | 67.41 ±0.30 | 67.70 ±0.30 | 74.55 ±0.22 | 75.01 ±0.22 | 76.15 ±0.20 | 74.50 ±0.22 | 71.15 ±0.24 | 76.70 ±0.26     |
| ReLU6               | 62.27 ±0.32 | 65.84 ±0.30 | 67.49 ±0.27 | 68.19 ±0.23 | 74.62 ±0.23 | 75.22 ±0.24 | 76.60 ±0.23 | 74.52 ±0.23 | 71.28 ±0.22 | 76.55 ±0.23     |
| PReLU               | 62.14 ±0.33 | 65.19 ±0.30 | 67.29 ±0.32 | 67.80 ±0.27 | 74.28 ±0.26 | 75.30 ±0.25 | 76.26 ±0.26 | 74.39 ±0.28 | 71.30 ±0.26 | 76.55 ±0.28     |
| ELU                 | 62.55 ±0.32 | 65.48 ±0.29 | 67.70 ±0.24 | 67.77 ±0.30 | 74.67 ±0.20 | 75.01 ±0.20 | 76.30 ±0.20 | 74.20 ±0.20 | 71.40 ±0.22 | 76.61 ±0.27     |
| Softplus            | 61.70 ±0.35 | 64.59 ±0.33 | 67.29 ±0.30 | 68.60 ±0.34 | 74.20 ±0.32 | 74.67 ±0.30 | 75.16 ±0.35 | 74.20 ±0.36 | 71.17 ±0.36 | 76.44 ±0.37     |
| GELU                | 64.48 ±0.27 | 66.67 ±0.23 | 69.80 ±0.28 | 70.19 ±0.28 | 74.98 ±0.21 | 76.12 ±0.20 | 77.22 ±0.20 | 75.29 ±0.22 | 72.01 ±0.21 | 77.42 ±0.21     |
| Swish               | 63.66 ±0.24 | 66.90 ±0.24 | 69.66 ±0.29 | 70.32 ±0.26 | 74.49 ±0.20 | 75.82 ±0.22 | 76.77 ±0.21 | 75.28 ±0.26 | 72.30 ±0.20 | 77.31 ±0.19     |
| PAU                 | 64.17 ±0.25 | 66.70 ±0.24 | 69.41 ±0.26 | 70.60 ±0.27 | 74.77 ±0.22 | 75.82 ±0.26 | 77.01 ±0.21 | 75.57 ±0.24 | 72.50 ±0.25 | 77.35 ±0.22     |
| Mish                | 64.82 ±0.22 | 67.92 ±0.24 | 70.56 ±0.23 | 71.40 ±0.20 | 75.21 ±0.20 | 76.59 ±0.23 | 77.79 ±0.21 | 76.29 ±0.22 | 73.61 ±0.24 | 78.26 ±0.24     |

Table 7. This is an extension to Table 2. We report Top-1 test accuracy (in %) on the CIFAR100 dataset for baseline functions for the mean of 20 different runs. mean±std is reported in the table.

| Activation Function | ResNet 18   | ResNet 34   | ResNet 50   | PreAct ResNet 18 | PreAct ResNet 34 | PreAct ResNet 50 | MobileNet V1 | MobileNet V2 |
|---------------------|-------------|-------------|-------------|------------------|------------------|------------------|--------------|--------------|
| Leaky ReLU          | 73.01 ±0.23 | 73.30 ±0.27 | 74.30 ±0.23 | 73.20 ±0.21      | 73.30 ±0.22      | 74.20 ±0.21      | 71.20 ±0.24  | 74.10 ±0.22  |
| ReLU6               | 73.30 ±0.22 | 73.50 ±0.24 | 74.20 ±0.22 | 73.40 ±0.21      | 73.50 ±0.20      | 74.35 ±0.21      | 71.47 ±0.22  | 74.40 ±0.21  |
| PReLU               | 73.10 ±0.25 | 73.45 ±0.26 | 74.20 ±0.26 | 73.10 ±0.23      | 73.55 ±0.28      | 74.16 ±0.24      | 71.51 ±0.31  | 74.59 ±0.29  |
| ELU                 | 73.30 ±0.22 | 73.60 ±0.24 | 74.33 ±0.25 | 73.30 ±0.20      | 73.41 ±0.22      | 74.59 ±0.24      | 71.30 ±0.21  | 74.32 ±0.22  |
| Softplus            | 72.67 ±0.34 | 73.29 ±0.35 | 74.00 ±0.37 | 72.83 ±0.37      | 73.22 ±0.33      | 73.82 ±0.34      | 71.00 ±0.37  | 74.41 ±0.34  |
| GELU                | 73.81 ±0.21 | 74.12 ±0.22 | 75.70 ±0.21 | 74.91 ±0.23      | 74.30 ±0.23      | 74.80 ±0.24      | 71.70 ±0.24  | 75.19 ±0.24  |
| Swish               | 73.55 ±0.22 | 74.04 ±0.22 | 75.23 ±0.22 | 75.20 ±0.22      | 74.70 ±0.19      | 75.19 ±0.20      | 71.99 ±0.20  | 75.26 ±0.21  |
| PAU                 | 74.19 ±0.21 | 74.40 ±0.23 | 75.91 ±0.22 | 74.80 ±0.23      | 74.80 ±0.22      | 75.81 ±0.20      | 71.71 ±0.23  | 75.01 ±0.20  |
| Mish                | 74.49 ±0.21 | 74.68 ±0.20 | 76.10 ±0.24 | 75.01 ±0.20      | 75.24 ±0.20      | 76.89 ±0.17      | 72.20 ±0.22  | 75.33 ±0.21  |

### 3. 3D Medical Imaging

The following subsections present detailed experimental results on 3D medical image classification, 3D medical image segmentation, and 2D medical image classification problems.

#### 3.1. 3D Medical Image Classification

In this section, we report experimental results for the 3D image classification problem on MosMed dataset [14]. The dataset has CT scans with COVID-19-related findings (CT1-CT4) and without any findings (CT0). The dataset

Table 8. This is an extension to Table 3. We report Top-1 test accuracy (in %) on the CIFAR10 dataset for baseline functions for the mean of 20 different runs. mean±std is reported in the table.

| Activation Function | ResNet 18      | ResNet 34      | ResNet 50      | PreAct ResNet 18 | PreAct ResNet 34 | PreAct ResNet 50 | MobileNet V1   | MobileNet V2    |
|---------------------|----------------|----------------|----------------|------------------|------------------|------------------|----------------|-----------------|
| Leaky ReLU          | 94.09<br>±0.22 | 94.14<br>±0.23 | 94.32<br>±0.25 | 93.43<br>±0.18   | 94.20<br>±0.20   | 94.25<br>±0.19   | 92.47<br>±0.19 | 94.17<br>±0.17  |
| ReLU6               | 94.22<br>±0.23 | 94.27<br>±0.26 | 94.30<br>±0.38 | 93.58<br>±0.22   | 94.12<br>±0.22   | 94.44<br>±0.21   | 92.58<br>±0.18 | 94.15<br>±0.18  |
| PReLU               | 94.15<br>±0.25 | 94.20<br>±0.26 | 94.20<br>±0.25 | 93.47<br>±0.21   | 94.20<br>±0.27   | 94.38<br>±0.29   | 92.44<br>±0.17 | 94.30<br>±0.21  |
| ELU                 | 94.20<br>±0.21 | 94.14<br>±0.21 | 94.27<br>±0.24 | 93.50<br>±0.20   | 94.30<br>±0.20   | 94.30<br>±0.21   | 92.60<br>±0.18 | 94.110<br>±0.17 |
| Softplus            | 93.71<br>±0.28 | 93.81<br>±0.28 | 93.68<br>±0.28 | 93.00<br>±0.27   | 93.95<br>±0.31   | 94.17<br>±0.29   | 91.89<br>±0.29 | 93.81<br>±0.27  |
| GELU                | 94.27<br>±0.19 | 94.44<br>±0.21 | 94.69<br>±0.21 | 93.56<br>±0.24   | 94.29<br>±0.22   | 94.57<br>±0.20   | 92.80<br>±0.23 | 94.26<br>±0.14  |
| Swish               | 94.30<br>±0.22 | 94.35<br>±0.23 | 94.76<br>±0.20 | 93.64<br>±0.19   | 94.23<br>±0.23   | 94.52<br>±0.21   | 92.57<br>±0.20 | 94.38<br>±0.16  |
| PAU                 | 94.26<br>±0.22 | 94.50<br>±0.24 | 94.55<br>±0.21 | 93.71<br>±0.21   | 94.17<br>±0.20   | 94.66<br>±0.22   | 93.12<br>±0.12 | 94.39<br>±0.12  |
| Mish                | 94.43<br>±0.21 | 94.29<br>±0.20 | 94.68<br>±0.21 | 93.81<br>±0.20   | 94.41<br>±0.21   | 94.71<br>±0.22   | 92.72<br>±0.22 | 94.71<br>±0.16  |

Table 9. Comparison between AMSU-1, AMSU-2, & AMSU-3 activations and other baseline activations on CIFAR10 dataset for image classification problem. We report Top-1 test accuracy (in %) for the mean of 20 different runs. mean±std is reported in the table.

| Activation Function | Alex Net              | Shuffle Net V1        | Google Net            | Inception V3          | Dense Net 121         | WideRes Net 28-10     | Squeeze Net           | VGG 16                | LeNet                 |
|---------------------|-----------------------|-----------------------|-----------------------|-----------------------|-----------------------|-----------------------|-----------------------|-----------------------|-----------------------|
| ReLU                | 84.17<br>±0.21        | 91.28<br>±0.21        | 92.82<br>±0.20        | 94.10<br>±0.20        | 94.82<br>±0.17        | 95.11<br>±0.18        | 90.50<br>±0.21        | 93.53<br>±0.17        | 75.71<br>±0.20        |
| Leaky ReLU          | 84.15<br>±0.20        | 91.48<br>±0.21        | 92.90<br>±0.16        | 94.18<br>±0.20        | 94.55<br>±0.20        | 94.91<br>±0.18        | 90.60<br>±0.18        | 93.63<br>±0.18        | 75.87<br>±0.21        |
| ReLU6               | 84.68<br>±0.18        | 91.60<br>±0.17        | 92.83<br>±0.14        | 94.10<br>±0.17        | 94.61<br>±0.21        | 95.40<br>±0.21        | 90.90<br>±0.20        | 93.78<br>±0.20        | 75.70<br>±0.20        |
| PReLU               | 84.21<br>±0.22        | 91.70<br>±0.22        | 92.90<br>±0.21        | 94.31<br>±0.23        | 94.44<br>±0.20        | 95.13<br>±0.23        | 90.88<br>±0.24        | 93.49<br>±0.20        | 75.81<br>±0.19        |
| ELU                 | 84.77<br>±0.20        | 91.80<br>±0.20        | 92.87<br>±0.18        | 94.52<br>±0.18        | 94.82<br>±0.20        | 95.30<br>±0.20        | 90.90<br>±0.18        | 93.90<br>±0.17        | 75.95<br>±0.20        |
| Softplus            | 84.12<br>±0.27        | 91.17<br>±0.27        | 92.61<br>±0.30        | 94.20<br>±0.29        | 94.39<br>±0.27        | 94.71<br>±0.25        | 90.54<br>±0.29        | 93.29<br>±0.26        | 75.50<br>±0.32        |
| GELU                | 85.10<br>±0.20        | 91.89<br>±0.21        | 93.40<br>±0.20        | 94.38<br>±0.15        | 94.80<br>±0.22        | 95.27<br>±0.20        | 90.77<br>±0.14        | 93.52<br>±0.17        | 77.77<br>±0.20        |
| Swish               | 85.27<br>±0.20        | 91.36<br>±0.21        | 93.19<br>±0.17        | 94.29<br>±0.17        | 94.71<br>±0.19        | 95.39<br>±0.20        | 91.21<br>±0.19        | 93.73<br>±0.19        | 77.61<br>±0.21        |
| PAU                 | 84.96<br>±0.22        | 91.81<br>±0.20        | 93.07<br>±0.17        | 94.20<br>±0.22        | 94.42<br>±0.21        | 94.93<br>±0.21        | 90.59<br>±0.20        | 93.49<br>±0.22        | 77.77<br>±0.22        |
| Mish                | 85.80<br>±0.18        | 91.88<br>±0.15        | 93.37<br>±0.19        | 94.38<br>±0.14        | 95.10<br>±0.15        | 95.50<br>±0.17        | 91.20<br>±0.18        | 93.83<br>±0.20        | <b>77.93</b><br>±0.18 |
| AMSU-1              | <b>87.37</b><br>±0.12 | <b>92.49</b><br>±0.16 | <b>94.21</b><br>±0.18 | <b>95.70</b><br>±0.12 | <b>96.03</b><br>±0.13 | <b>96.12</b><br>±0.12 | <b>91.86</b><br>±0.12 | <b>94.52</b><br>±0.11 | 77.75<br>±0.18        |
| AMSU-2              | <b>87.30</b><br>±0.14 | <b>92.50</b><br>±0.17 | <b>94.10</b><br>±0.15 | <b>95.79</b><br>±0.14 | <b>96.14</b><br>±0.12 | <b>96.03</b><br>±0.11 | <b>91.70</b><br>±0.14 | <b>94.60</b><br>±0.12 | 77.61<br>±0.16        |
| AMSU-3              | <b>86.98</b><br>±0.15 | <b>92.20</b><br>±0.12 | <b>93.88</b><br>±0.18 | <b>95.39</b><br>±0.16 | <b>95.60</b><br>±0.14 | <b>95.91</b><br>±0.12 | <b>91.49</b><br>±0.14 | <b>94.40</b><br>±0.16 | 77.45<br>±0.14        |

Table 10. This is an extension to Table 3. We report Top-1 test accuracy (in %) on the CIFAR10 dataset for baseline functions for the mean of 20 different runs. mean±std is reported in the table. SF V2 stands for ShuffleNet v2.

| Activation Function | SF V2 0.5x     | SF V2 1.0x     | SF V2 1.5x     | SF V2 2.0x     | SeNet 18       | SeNet 34       | SeNet 50       | Res-Next       | Xception       | EfficientNet B0 |
|---------------------|----------------|----------------|----------------|----------------|----------------|----------------|----------------|----------------|----------------|-----------------|
| Leaky ReLU          | 88.20<br>±0.23 | 91.28<br>±0.26 | 91.11<br>±0.23 | 91.79<br>±0.26 | 94.23<br>±0.25 | 94.61<br>±0.24 | 94.39<br>±0.19 | 93.33<br>±0.20 | 90.89<br>±0.23 | 95.49<br>±0.14  |
| ReLU6               | 88.59<br>±0.20 | 91.27<br>±0.22 | 91.21<br>±0.21 | 91.76<br>±0.19 | 94.25<br>±0.19 | 94.61<br>±0.22 | 94.60<br>±0.20 | 93.39<br>±0.20 | 91.11<br>±0.19 | 95.21<br>±0.14  |
| PReLU               | 88.24<br>±0.21 | 91.11<br>±0.20 | 91.33<br>±0.21 | 91.68<br>±0.22 | 94.21<br>±0.22 | 94.47<br>±0.22 | 94.51<br>±0.21 | 93.22<br>±0.21 | 91.18<br>±0.22 | 95.31<br>±0.20  |
| ELU                 | 88.09<br>±0.20 | 91.02<br>±0.23 | 91.40<br>±0.23 | 91.77<br>±0.21 | 94.30<br>±0.23 | 94.30<br>±0.24 | 94.60<br>±0.23 | 93.41<br>±0.22 | 91.51<br>±0.20 | 95.30<br>±0.20  |
| Softplus            | 87.86<br>±0.29 | 90.31<br>±0.28 | 91.11<br>±0.30 | 90.91<br>±0.28 | 93.91<br>±0.27 | 94.11<br>±0.28 | 94.31<br>±0.28 | 93.17<br>±0.26 | 90.32<br>±0.24 | 94.92<br>±0.22  |
| GELU                | 88.81<br>±0.21 | 91.55<br>±0.22 | 91.85<br>±0.18 | 92.17<br>±0.16 | 94.32<br>±0.18 | 94.72<br>±0.18 | 94.67<br>±0.14 | 93.55<br>±0.21 | 92.08<br>±0.21 | 95.40<br>±0.19  |
| Swish               | 89.15<br>±0.18 | 91.77<br>±0.20 | 91.72<br>±0.23 | 92.05<br>±0.21 | 94.20<br>±0.20 | 94.60<br>±0.20 | 94.40<br>±0.18 | 93.50<br>±0.18 | 91.55<br>±0.18 | 95.41<br>±0.14  |
| PAU                 | 89.30<br>±0.20 | 91.59<br>±0.22 | 92.11<br>±0.18 | 92.18<br>±0.18 | 94.21<br>±0.20 | 94.65<br>±0.21 | 94.61<br>±0.19 | 93.57<br>±0.18 | 91.99<br>±0.23 | 95.40<br>±0.16  |
| Mish                | 89.30<br>±0.18 | 91.85<br>±0.19 | 92.30<br>±0.18 | 92.40<br>±0.17 | 94.37<br>±0.17 | 94.68<br>±0.17 | 94.88<br>±0.14 | 93.90<br>±0.16 | 92.20<br>±0.22 | 95.77<br>±0.14  |

has 1110 studies. We consider 70% of the data as training data and 30% of the data used for testing. We use 0.0001 initial learning rate and decay the learning rate with cosine annealing learning rate scheduler [11]. We use Adam optimizer [8],  $5e^{-4}$  weight decay, a batch size of 8, and trained up to 200 epochs with 3D ResNet-18 model. Experimental

results are reported in Table 12 for the mean of 10 different runs.

### 3.2. 3D Medical Image Segmentation

In this section, we report experimental results for 3D brain tumor segmentation using 3D-UNet [20] on the BraTS

Table 11. Comparison between AMSU-1, AMSU-2, & AMSU-3 activations and other baseline activations on WMT2014 dataset for machine translation problem. We report the BLEU score for the mean of 10 different runs. mean $\pm$ std is reported in the table.

| Activation Function | BLEU Score             |
|---------------------|------------------------|
| ReLU                | 26.2 $\pm$ 0.13        |
| Leaky ReLU          | 26.3 $\pm$ 0.17        |
| PReLU               | 26.2 $\pm$ 0.15        |
| ReLU6               | 26.1 $\pm$ 0.16        |
| ELU                 | 25.2 $\pm$ 0.14        |
| SoftPlus            | 23.5 $\pm$ 0.18        |
| Swish               | 26.4 $\pm$ 0.13        |
| Mish                | 26.3 $\pm$ 0.14        |
| GELU                | 26.4 $\pm$ 0.14        |
| PAU                 | 26.3 $\pm$ 0.17        |
| AMSU-1              | <b>26.8</b> $\pm$ 0.11 |
| AMSU-2              | <b>26.8</b> $\pm$ 0.12 |
| AMSU-3              | <b>26.5</b> $\pm$ 0.14 |

Table 12. Comparison between AMSU-1, AMSU-2, & AMSU-3 and other baseline activations on MosMedData dataset for 3D image classification with ResNet-18 model. We report Top-1 accuracy for the mean of 10 different runs.

| Activation Function | Accuracy     |
|---------------------|--------------|
| ReLU                | 79.57        |
| Leaky ReLU          | 79.74        |
| PReLU               | 79.88        |
| ReLU6               | 79.77        |
| ELU                 | 79.83        |
| SoftPlus            | 79.62        |
| Swish               | 80.03        |
| Mish                | 80.18        |
| GELU                | 79.99        |
| PAU                 | 80.11        |
| AMSU-1              | <b>80.70</b> |
| AMSU-2              | <b>80.55</b> |
| AMSU-3              | <b>80.22</b> |

Table 13. Comparison between baseline activations and AMSU-1, AMSU-2, & AMSU-3 on the CIFAR10 dataset for FGSM Adversarial attack ( $\epsilon = 0.03$ ). We report Top-1 accuracy for the mean of 5 different runs. mean $\pm$ std is reported in the table.

| Activation Function | ShuffleNet V2 (2.0x)    | MobileNet V2            |
|---------------------|-------------------------|-------------------------|
| ReLU                | 87.45 $\pm$ 0.18        | 90.61 $\pm$ 0.16        |
| Leaky ReLU          | 87.57 $\pm$ 0.13        | 90.68 $\pm$ 0.11        |
| PReLU               | 87.81 $\pm$ 0.12        | 90.58 $\pm$ 0.11        |
| ReLU6               | 87.88 $\pm$ 0.12        | 90.69 $\pm$ 0.12        |
| ELU                 | 87.99 $\pm$ 0.14        | 90.82 $\pm$ 0.14        |
| SoftPlus            | 87.54 $\pm$ 0.20        | 90.78 $\pm$ 0.17        |
| Swish               | 89.67 $\pm$ 0.11        | 91.50 $\pm$ 0.12        |
| Mish                | 89.37 $\pm$ 0.14        | 91.69 $\pm$ 0.14        |
| GELU                | 89.18 $\pm$ 0.16        | 91.51 $\pm$ 0.12        |
| PAU                 | 89.97 $\pm$ 0.11        | 91.70 $\pm$ 0.13        |
| AMSU-1              | <b>91.29</b> $\pm$ 0.10 | <b>92.38</b> $\pm$ 0.12 |
| AMSU-2              | <b>91.12</b> $\pm$ 0.12 | <b>92.47</b> $\pm$ 0.11 |
| AMSU-3              | <b>90.67</b> $\pm$ 0.14 | <b>92.14</b> $\pm$ 0.11 |

2020 dataset [1, 2, 13]. This data set has 369 samples for training and 125 samples for validation. For this experiment, we consider a batch size of 2, and Adam optimizer [8] with  $5e^{-4}$  weight decay, the initial learning rate is 0.001, and cosine annealing learning rate scheduler, and we train this 3D model for 150 epochs. We presented the network performance analysis for AMSU-1, AMSU-2, & AMSU-3 and the baseline activation functions with this network in Table 14 in terms of Accuracy and Dice Score to measure the performance.

Table 14. Comparison between AMSU-1, AMSU-2, & AMSU-3 and other baseline activations on BraTS 2020 Dataset for 3D image segmentation with 3D-Unet Model.

| Activation Function | Accuracy     | Dice Score   |
|---------------------|--------------|--------------|
| ReLU                | 95.03        | 97.40        |
| Leaky ReLU          | 94.99        | 97.36        |
| PReLU               | 94.98        | 97.35        |
| ReLU6               | 94.91        | 97.36        |
| ELU                 | 95.08        | 97.39        |
| SoftPlus            | 94.88        | 97.37        |
| Swish               | 95.15        | 97.48        |
| Mish                | 95.10        | 97.50        |
| GELU                | 95.15        | 97.31        |
| PAU                 | 95.22        | 97.52        |
| AMSU-1              | <b>95.47</b> | <b>97.70</b> |
| AMSU-2              | <b>95.49</b> | <b>97.67</b> |
| AMSU-3              | <b>95.38</b> | <b>97.59</b> |

### 3.3. 2D Medical Image Classification

We use RadImageNet [12] database for 2D medical image classification tasks, which is an open-access medical imaging database designed to improve transfer learning performance on downstream medical imaging applications and perhaps it is the largest ever medical imaging dataset so far. We run experiment on CT abdominal/pelvis and Lung data from the whole dataset, consisting of 28 and 6 disease classes, respectively. We also run experiments on MRI abdominal/pelvis and Brain data, consisting of 26 and 10 disease classes. No pre-trained weight is used for our experiments. We consider a batch size 32, 0.00001 initial learning rate, Adam [8] optimizer, and  $1e^{-4}$  weight decay. The results are reported with ResNet-50 in Table 17. We got almost 6%, 3%, 3%, and 2% improvement compared to ReLU on Abdomen (CT), Lung (CT), Abdomen (MRI), and Brain (MRI), respectively. We also report results with ShuffleNet and MobileNet V2 in Table 15, and Table 18 on Abdomen (CT) and Abdomen (MRI).

Table 15. Comparison between AMSU-1, AMSU-2, & AMSU-3 activations and other baseline activations on the RadImageNet dataset for 2D medical image classification problem on ShuffleNet architecture. We report Top-1 test accuracy (in %) for the mean of 3 different runs. mean $\pm$ std is reported in the table.

| Activation Function | Abdomen (CT)            | Abdomen (MRI)           |
|---------------------|-------------------------|-------------------------|
| ReLU                | 62.61 $\pm$ 0.22        | 84.41 $\pm$ 0.15        |
| Leaky ReLU          | 62.75 $\pm$ 0.21        | 84.56 $\pm$ 0.18        |
| ReLU6               | 62.66 $\pm$ 0.21        | 84.76 $\pm$ 0.20        |
| PReLU               | 62.89 $\pm$ 0.19        | 84.60 $\pm$ 0.22        |
| ELU                 | 63.20 $\pm$ 0.20        | 84.89 $\pm$ 0.20        |
| Softplus            | 62.55 $\pm$ 0.20        | 84.50 $\pm$ 0.16        |
| GELU                | 63.91 $\pm$ 0.19        | 85.06 $\pm$ 0.17        |
| Swish               | 64.26 $\pm$ 0.20        | 85.02 $\pm$ 0.19        |
| PAU                 | 64.59 $\pm$ 0.18        | 85.17 $\pm$ 0.20        |
| Mish                | 64.97 $\pm$ 0.18        | 85.65 $\pm$ 0.18        |
| AMSU-1              | <b>65.78</b> $\pm$ 0.17 | <b>86.10</b> $\pm$ 0.17 |
| AMSU-2              | <b>65.39</b> $\pm$ 0.19 | <b>85.89</b> $\pm$ 0.18 |
| AMSU-3              | <b>65.19</b> $\pm$ 0.19 | <b>85.90</b> $\pm$ 0.17 |

### 3.4. 2D Medical Image Segmentation

We consider the Liver Tumor Segmentation Benchmark (LiTS) [3] dataset for the segmentation tasks. LiTS is a multi-center dataset collected from seven clinical centers.

Table 16. Baseline table for AMSU-3. These numbers represent the total number of models in which AMSU-3 outperforms, equals, or underperforms compared to the baseline activation functions

| Baselines         | ReLU | Leaky ReLU | ELU | SoftPlus | PReLU | ReLU6 | Swish | Mish | GELU | PAU |
|-------------------|------|------------|-----|----------|-------|-------|-------|------|------|-----|
| AMSU-3 > Baseline | 101  | 101        | 101 | 102      | 101   | 101   | 97    | 96   | 97   | 96  |
| AMSU-3 = Baseline | 0    | 0          | 0   | 0        | 0     | 0     | 0     | 0    | 0    | 0   |
| AMSU-3 < Baseline | 1    | 1          | 1   | 0        | 1     | 1     | 5     | 6    | 5    | 6   |

Table 17. Comparison between AMSU-1, AMSU-2, & AMSU-3 activations and other baseline activations on the RadImageNet dataset for 2D medical image classification problem on **ResNet-50** architecture. We report Top-1 test accuracy (in %) for the mean of 3 different runs. mean±std is reported in the table.

| Activation Function | Abdomen (CT)        | Lung (CT)           | Abdomen (MRI)       | Brain (MRI)         |
|---------------------|---------------------|---------------------|---------------------|---------------------|
| ReLU                | 67.50 ± 0.20        | 84.38 ± 0.20        | 86.67 ± 0.17        | 87.10 ± 0.18        |
| Leaky ReLU          | 68.03 ± 0.18        | 84.56 ± 0.15        | 86.89 ± 0.16        | 87.37 ± 0.20        |
| ReLU6               | 68.18 ± 0.20        | 84.58 ± 0.18        | 87.10 ± 0.17        | 87.31 ± 0.18        |
| PReLU               | 68.62 ± 0.17        | 84.72 ± 0.17        | 87.22 ± 0.22        | 87.50 ± 0.20        |
| ELU                 | 68.45 ± 0.20        | 84.70 ± 0.19        | 87.45 ± 0.20        | 87.57 ± 0.18        |
| Softplus            | 68.12 ± 0.20        | 84.30 ± 0.21        | 87.10 ± 0.24        | 87.41 ± 0.21        |
| GELU                | 70.60 ± 0.15        | 85.85 ± 0.18        | 88.12 ± 0.20        | 88.02 ± 0.18        |
| Swish               | 70.88 ± 0.16        | 86.00 ± 0.17        | 88.60 ± 0.21        | 87.91 ± 0.20        |
| PAU                 | 71.10 ± 0.15        | 86.27 ± 0.17        | 88.51 ± 0.20        | 88.25 ± 0.18        |
| Mish                | 71.45 ± 0.17        | 86.10 ± 0.18        | 88.31 ± 0.20        | 87.87 ± 0.18        |
| AMSU-1              | <b>73.37</b> ± 0.15 | <b>87.50</b> ± 0.16 | <b>89.68</b> ± 0.14 | <b>89.30</b> ± 0.16 |
| AMSU-2              | <b>72.92</b> ± 0.16 | <b>87.20</b> ± 0.14 | <b>89.78</b> ± 0.17 | <b>89.12</b> ± 0.17 |
| AMSU-3              | <b>72.47</b> ± 0.17 | <b>86.91</b> ± 0.16 | <b>89.30</b> ± 0.16 | <b>88.80</b> ± 0.17 |

Table 18. Comparison between AMSU-1, AMSU-2, & AMSU-3 activations and other baseline activations on the RadImageNet dataset for 2D medical image classification problem on **MobileNet V2** architecture. We report Top-1 test accuracy (in %) for the mean of 3 different runs. mean±std is reported in the table.

| Activation Function | Abdomen (CT)        | Abdomen (MRI)       |
|---------------------|---------------------|---------------------|
| ReLU                | 58.51 ± 0.18        | 82.77 ± 0.17        |
| Leaky ReLU          | 58.73 ± 0.17        | 82.90 ± 0.19        |
| ReLU6               | 59.02 ± 0.17        | 83.01 ± 0.17        |
| PReLU               | 58.81 ± 0.19        | 82.81 ± 0.20        |
| ELU                 | 59.22 ± 0.20        | 83.21 ± 0.18        |
| Softplus            | 58.70 ± 0.22        | 82.87 ± 0.20        |
| GELU                | 59.74 ± 0.18        | 82.90 ± 0.18        |
| Swish               | 59.97 ± 0.16        | 82.87 ± 0.17        |
| PAU                 | 60.45 ± 0.19        | 83.26 ± 0.18        |
| Mish                | 60.78 ± 0.18        | 83.40 ± 0.17        |
| AMSU-1              | <b>61.23</b> ± 0.19 | <b>83.89</b> ± 0.18 |
| AMSU-2              | <b>61.04</b> ± 0.18 | <b>83.98</b> ± 0.16 |
| AMSU-3              | <b>60.86</b> ± 0.18 | <b>83.68</b> ± 0.17 |

The dataset contains 201 CT images of the abdomen. The whole dataset is distributed into a training dataset with 130 CT scans, and the test dataset has 71 CT scans. We consider a batch size 16 and learning rate  $1e^{-4}$  with Adam optimizer. We consider the input image size of  $256 \times 256$ . The results are reported in Table 19 and Table 20 with Unet [15], NanoNet-A [7], Unext [17], and ResUnet++ [6].

#### 4. Adversarial Attack

Top-1 accuracy is presented in Table 21 ( $\epsilon = 0.04$ ) on the CIFAR10 dataset for the FGSM Adversarial attack [5] for a mean of 10 different runs.

Table 19. Comparison of different activation functions on liver segmentation benchmark (LiTS) dataset.

| Activation Function | UNet         |              |              |              | UNext        |              |              |              |
|---------------------|--------------|--------------|--------------|--------------|--------------|--------------|--------------|--------------|
|                     | mDSC         | mIoU         | Rec.         | Prec.        | mDSC         | mIoU         | Rec.         | Prec.        |
| ReLU                | 82.11        | 73.51        | 77.96        | 91.18        | 80.29        | 71.29        | <b>78.90</b> | 87.80        |
| LReLU               | 82.47        | 73.98        | 78.46        | 91.17        | 80.92        | 72.15        | 76.84        | 90.85        |
| ReLU6               | 82.34        | 73.50        | 78.04        | 91.31        | 80.20        | 71.17        | 78.55        | 87.49        |
| PReLU               | 82.71        | 73.91        | 78.77        | 91.21        | 79.08        | 69.95        | 77.38        | 88.55        |
| ELU                 | 82.89        | 73.70        | 78.97        | 91.39        | 79.20        | 69.77        | 77.17        | 88.27        |
| SoftPlus            | 82.00        | 73.77        | 77.55        | 91.01        | 79.10        | 70.80        | 78.55        | 87.98        |
| GELU                | 83.20        | 73.88        | 79.01        | 91.22        | 81.01        | 72.61        | 78.79        | 88.09        |
| Swish               | 83.01        | 73.99        | 78.57        | 90.45        | 81.16        | 72.19        | 78.87        | 88.29        |
| PAU                 | 82.68        | 73.60        | 78.78        | 90.90        | 80.67        | 72.01        | <b>78.90</b> | 88.01        |
| Mish                | 82.48        | 73.88        | 78.44        | 90.46        | 80.39        | 72.55        | 78.80        | 87.55        |
| AMSU-1              | <b>83.62</b> | <b>75.08</b> | <b>80.59</b> | <b>93.29</b> | <b>82.10</b> | <b>73.10</b> | 78.60        | <b>91.17</b> |
| AMSU-2              | <b>83.71</b> | <b>74.98</b> | <b>80.44</b> | <b>93.40</b> | <b>82.10</b> | <b>73.09</b> | 78.77        | <b>91.34</b> |
| AMSU-3              | <b>83.22</b> | <b>74.56</b> | <b>80.12</b> | <b>93.20</b> | <b>81.67</b> | <b>72.91</b> | 78.11        | <b>90.89</b> |

Table 20. Comparison of different activation functions on liver segmentation benchmark (LiTS) dataset.

| Activation Function | NanoNet-A    |              |              |              | ResUnet++    |              |              |              |
|---------------------|--------------|--------------|--------------|--------------|--------------|--------------|--------------|--------------|
|                     | mDSC         | mIoU         | Rec.         | Prec.        | mDSC         | mIoU         | Rec.         | Prec.        |
| ReLU                | 75.17        | 66.62        | 73.40        | 83.11        | 76.90        | 68.03        | 79.81        | 83.43        |
| LReLU               | 74.10        | 65.10        | 73.29        | 84.12        | 74.98        | 66.47        | 74.55        | 83.92        |
| ReLU6               | 75.28        | 66.60        | 73.49        | 83.30        | 76.99        | 67.80        | 79.67        | 83.33        |
| PReLU               | 74.88        | 66.21        | 72.50        | 85.39        | 74.30        | 65.87        | 74.21        | 81.80        |
| ELU                 | 74.90        | 66.40        | 72.40        | 85.10        | 74.67        | 65.60        | 74.20        | 81.60        |
| SoftPlus            | 75.20        | 66.20        | 73.67        | 83.20        | 76.67        | 68.10        | 80.10        | 81.55        |
| GELU                | 74.99        | 66.56        | 72.58        | 85.45        | 74.43        | 65.34        | 74.45        | 84.61        |
| Swish               | 74.67        | 66.50        | 72.20        | 85.18        | 74.21        | 65.22        | 74.23        | 84.40        |
| PAU                 | 74.45        | 66.42        | 72.01        | 84.89        | 74.20        | 64.91        | 74.01        | 84.17        |
| Mish                | 74.50        | 66.20        | 71.67        | 84.55        | 74.31        | 64.90        | 74.17        | 84.55        |
| AMSU-1              | <b>76.81</b> | <b>67.52</b> | <b>76.10</b> | <b>84.90</b> | <b>78.37</b> | <b>69.76</b> | <b>81.85</b> | <b>84.70</b> |
| AMSU-2              | <b>76.55</b> | <b>67.80</b> | <b>76.11</b> | <b>84.97</b> | <b>78.56</b> | <b>69.70</b> | <b>81.55</b> | 84.39        |
| AMSU-3              | <b>76.70</b> | <b>67.41</b> | <b>75.78</b> | <b>84.70</b> | <b>78.01</b> | <b>69.54</b> | <b>81.51</b> | 84.01        |

Table 21. Comparison between baseline activations and AMSU-1, AMSU-2, & AMSU-3 on the CIFAR10 dataset for FGSM Adversarial attack ( $\epsilon = 0.04$ ). We report Top-1 accuracy for the mean of 5 different runs. mean±std is reported in the table.

| Activation Function | ShuffleNet V2 (2.0x) | MobileNet V2        |
|---------------------|----------------------|---------------------|
| ReLU                | 87.36 ± 0.15         | 90.57 ± 0.17        |
| Leaky ReLU          | 87.50 ± 0.12         | 90.60 ± 0.11        |
| PReLU               | 87.78 ± 0.12         | 90.49 ± 0.13        |
| ReLU6               | 87.86 ± 0.14         | 90.59 ± 0.14        |
| ELU                 | 87.87 ± 0.15         | 90.74 ± 0.12        |
| SoftPlus            | 87.49 ± 0.19         | 90.62 ± 0.16        |
| Swish               | 89.60 ± 0.12         | 91.43 ± 0.11        |
| Mish                | 89.29 ± 0.13         | 91.66 ± 0.15        |
| GELU                | 89.09 ± 0.13         | 91.40 ± 0.12        |
| PAU                 | 89.87 ± 0.13         | 91.74 ± 0.12        |
| AMSU-1              | <b>91.22</b> ± 0.11  | <b>92.31</b> ± 0.10 |
| AMSU-2              | <b>91.02</b> ± 0.10  | <b>92.39</b> ± 0.12 |
| AMSU-3              | <b>90.56</b> ± 0.14  | <b>92.02</b> ± 0.09 |

#### References

- [1] Spyridon Bakas, Hamed Akbari, Aristeidis Sotiras, Michel Bilello, Martin Rozycki, Justin S Kirby, John B Freymann, Keyvan Farahani, and Christos Davatzikos. Advancing the cancer genome atlas glioma mri collections with expert segmentation labels and radiomic features. *Scientific data*,



- 4(1):1–13, 2017. 5
- [2] Spyridon Bakas, Mauricio Reyes, Andras Jakab, Stefan Bauer, Markus Rempfler, Alessandro Crimi, Russell Takeshi Shinohara, Christoph Berger, Sung Min Ha, Martin Rozycki, et al. Identifying the best machine learning algorithms for brain tumor segmentation, progression assessment, and overall survival prediction in the brats challenge. *arXiv preprint arXiv:1811.02629*, 2018. 5
- [3] Patrick Bilic, Patrick Christ, Hongwei Bran Li, Eugene Vorontsov, Avi Ben-Cohen, Georgios Kaissis, Adi Szeskin, Colin Jacobs, Gabriel Efrain Humpire Mamani, Gabriel Chartrand, et al. The liver tumor segmentation benchmark (lits). *Medical Image Analysis*, 84:102680, 2023. 5
- [4] Marius Cordts, Mohamed Omran, Sebastian Ramos, Timo Rehfeld, Markus Enzweiler, Rodrigo Benenson, Uwe Franke, Stefan Roth, and Bernt Schiele. The cityscapes dataset for semantic urban scene understanding, 2016. 2
- [5] Ian J. Goodfellow, Jonathon Shlens, and Christian Szegedy. Explaining and harnessing adversarial examples, 2015. 6
- [6] Debesh Jha, Pia H Smedsrud, Michael A Riegler, Dag Johansen, Thomas De Lange, Pål Halvorsen, and Håvard D Johansen. ResUNet++: An Advanced Architecture for Medical Image Segmentation. In *Proc. of int. symposium on multimedia*, pages 225–2255, 2019. 6
- [7] Debesh Jha, Nikhil Kumar Tomar, Sharib Ali, Michael A Riegler, Håvard D Johansen, Dag Johansen, Thomas de Lange, and Pål Halvorsen. Nanonet: Real-time polyp segmentation in video capsule endoscopy and colonoscopy. In *Proceedings of the International Symposium on Computer-Based Medical Systems (CBMS)*, pages 37–43, 2021. 6
- [8] Diederik P. Kingma and Jimmy Ba. Adam: A method for stochastic optimization. In Yoshua Bengio and Yann LeCun, editors, *3rd International Conference on Learning Representations, ICLR 2015, San Diego, CA, USA, May 7-9, 2015, Conference Track Proceedings*, 2015. 2, 4, 5
- [9] Alex Krizhevsky, Ilya Sutskever, and Geoffrey E. Hinton. Imagenet classification with deep convolutional neural networks. In *Proceedings of the 25th International Conference on Neural Information Processing Systems - Volume 1, NIPS'12*, page 1097–1105, Red Hook, NY, USA, 2012. Curran Associates Inc. 2
- [10] Y. Lecun, L. Bottou, Y. Bengio, and P. Haffner. Gradient-based learning applied to document recognition. *Proceedings of the IEEE*, 86(11):2278–2324, 1998. 2
- [11] Ilya Loshchilov and Frank Hutter. Sgdr: Stochastic gradient descent with warm restarts, 2017. 4
- [12] Xueyan Mei, Zelong Liu, Philip M Robson, Brett Marinelli, Mingqian Huang, Amish Doshi, Adam Jacobi, Chendi Cao, Katherine E Link, Thomas Yang, et al. RadImageNet: RadImageNet: An Open Radiologic Deep Learning Research Dataset for Effective Transfer Learning. *Radiology: Artificial Intelligence*, 4(5):e210315, 2022. 5
- [13] Bjoern H Menze, Andras Jakab, Stefan Bauer, Jayashree Kalpathy-Cramer, Keyvan Farahani, Justin Kirby, Yuliya Burren, Nicole Porz, Johannes Slotboom, Roland Wiest, et al. The multimodal brain tumor image segmentation benchmark (brats). *IEEE transactions on medical imaging*, 34(10):1993–2024, 2014. 5
- [14] S. P. Morozov, A. E. Andreychenko, N. A. Pavlov, A. V. Vladzmyrskyy, N. V. Ledikhova, V. A. Gomboleviskiy, I. A. Blokhin, P. B. Gelezhe, A. V. Gonchar, and V. Yu. Chernina. Mosmeddata: Chest ct scans with covid-19 related findings dataset, 2020. 3
- [15] Olaf Ronneberger, Philipp Fischer, and Thomas Brox. U-net: Convolutional networks for biomedical image segmentation, 2015. 6
- [16] Nitish Srivastava, Geoffrey Hinton, Alex Krizhevsky, Ilya Sutskever, and Ruslan Salakhutdinov. Dropout: A simple way to prevent neural networks from overfitting. *J. Mach. Learn. Res.*, 15(1):1929–1958, Jan. 2014. 2
- [17] Jeya Maria Jose Valanarasu and Vishal M. Patel. Unext: Mlp-based rapid medical image segmentation network, 2022. 6
- [18] Ashish Vaswani, Noam Shazeer, Niki Parmar, Jakob Uszkoreit, Llion Jones, Aidan N. Gomez, Lukasz Kaiser, and Illia Polosukhin. Attention is all you need, 2017. 2
- [19] Hengshuang Zhao, Jianping Shi, Xiaojuan Qi, Xiaogang Wang, and Jiaya Jia. Pyramid scene parsing network, 2017. 2
- [20] Özgün Çiçek, Ahmed Abdulkadir, Soeren S. Lienkamp, Thomas Brox, and Olaf Ronneberger. 3d u-net: Learning dense volumetric segmentation from sparse annotation, 2016. 4
